# Supplementary material for: Application of therapeutic plasma exchange in dogs with immune‐mediated thrombocytopenia
Source: PubMed Central journal article supplement (PMC7379011; doi:10.1111/jvim.15836), 2020-06-19
Supplement: JVIM-34-1576-s001.pdf [file JVIM-34-1576-s001.pdf]

**Supplemental Table 1.** Summary of hematologic data for four dogs with IMT on the day of starting TPE.

|                              | <b>Reference range</b> | <b>Dog 1</b> | <b>Dog 2</b> | <b>Dog 3</b> | <b>Dog 4</b> |
|------------------------------|------------------------|--------------|--------------|--------------|--------------|
| HCT (%)                      | 40-55                  | 18.7         | 18.9         | 19.2         | 23.6         |
| Reticulocyte count (/μL)     | 7,000-65,000           | 312,300      | -            | 279,000      | 396,000      |
| White blood cell count (/μL) | 6,000-13,000           | 16,865       | 37,070       | 25,417       | 17,760       |
| Neutrophil count (/μL)       | 3,000-10,500           | 12,143       | -            | 17,538       | 14,030       |
| Band neutrophils (/μL)       | Rare                   | 2,530        | -            | 3,813        | 1,243        |
| Platelet count (/μL)         | 150-400,000            | 6,000        | 17,000       | 6,000        | 13,000       |
| Mean platelet volume (fl)    | 7-13                   | 12.3         | 13.7         | 16.0         | 12.2         |
| Plasma protein (g/dL)        | 6.0-8.0                | 4.8          | -            | 5.4          | 4.6          |
